# Supplementary material
Source: PubMed Central journal article supplement (PMC3196369)
Supplement: NIHMS323418-supplement-01.pdf [file NIHMS323418-supplement-01.pdf]

## **Supplementary Data**

### **NHR-23 dependent collagen and hedgehog-related genes required for molting**

Nathaniel A. Kouns, Johana Nakielna, Frantisek Behensky, Michael W. Krause, Zdenek

Kostrouch, Marta Kostrouchova

**Supplementary Table S1. Primers used for expression analysis**

| Gene         | forward                   | reverse              | Primer No. forward | Primer No. reverse | Amplicon length bp | probe number or sequence    |
|--------------|---------------------------|----------------------|--------------------|--------------------|--------------------|-----------------------------|
| <i>wrt-1</i> | cgaatgtgagaaaaataacttctgg | gcagttcatacgggtgacag | 7337               | 7338               | 71                 | 123                         |
| <i>wrt-2</i> | tggagaacaagaaacgagaaaac   | aagctgttggggtggtg    | 7339               | 7340               | 78                 | 70                          |
| <i>wrt-4</i> | ggaggaattgcaccagtcac      | gtgcagcactttaggcaac  | 7341               | 7342               | 62                 | 119                         |
| <i>ama-1</i> | gagtcatagatcgtcgtggaagatg | tgagaagccgtccgcagtag | ama-1 F            | ama-1 R            | 202                | cccgatttcacattggattccctcaca |
| <i>dpy-2</i> | ccagctccacgtgataatgtt     | ccgtcgtttgactctgagaa | 7381               | 7382               | 67                 | 156                         |
| <i>dpy-3</i> | ggagcaccaggaagacca        | cgaagaagtgtccgtct    | 7327               | 7328               | 60                 | 131                         |
| <i>dpy-7</i> | cagcattgccagtgct          | atgttgcgagcaacgaact  | 7335               | 7336               | 120                | 125                         |
| <i>dpy-8</i> | aaactatgtgaccagaaagagg    | atgcattcggttagcgtagg | 7329               | 7330               | 67                 | 74                          |

Primers and probes were designed using the Probe Finder software ([www.roche-applied-science.com](http://www.roche-applied-science.com) from F. Hoffmann-La Roche Ltd, Switzerland);

*ama-1* is labeled with DYXL dye.

**Supplementary Table S2. Genes identified as decreased in *nhr-23* RNAi microarray experiment**

| <b>Gene WB ID</b>              | <b>Gene Public Name</b> | <b>Sequence Name (Gene)</b> | <b>Oligo Set</b>            |
|--------------------------------|-------------------------|-----------------------------|-----------------------------|
| <a href="#">WBGene00000029</a> | <a href="#">abu-6</a>   | <a href="#">C03A7.7</a>     | <a href="#">172323 x at</a> |
| <a href="#">WBGene00000030</a> | <a href="#">abu-7</a>   | <a href="#">C03A7.8</a>     | <a href="#">172321 x at</a> |
| <a href="#">WBGene00000031</a> | <a href="#">abu-8</a>   | <a href="#">C03A7.14</a>    | <a href="#">172587 x at</a> |
| <a href="#">WBGene00000033</a> | <a href="#">abu-10</a>  | <a href="#">F35A5.3</a>     | <a href="#">179983 at</a>   |
| <a href="#">WBGene00000034</a> | <a href="#">abu-11</a>  | <a href="#">T01D1.6</a>     | <a href="#">173482 s at</a> |
| <a href="#">WBGene00000039</a> | <a href="#">acn-1</a>   | <a href="#">C42D8.5</a>     | <a href="#">188527 s at</a> |
| <a href="#">WBGene00000220</a> | <a href="#">atf-2</a>   | <a href="#">K08F8.2</a>     | <a href="#">189943 at</a>   |
| <a href="#">WBGene00000248</a> | <a href="#">ben-1</a>   | <a href="#">C54C6.2</a>     | <a href="#">174883 s at</a> |
| <a href="#">WBGene00000399</a> | <a href="#">cdh-7</a>   | <a href="#">R05H10.6</a>    | <a href="#">190177 at</a>   |
| <a href="#">WBGene00000402</a> | <a href="#">cdh-10</a>  | <a href="#">C45G7.5</a>     | <a href="#">180954 at</a>   |
| <a href="#">WBGene00000618</a> | <a href="#">col-41</a>  | <a href="#">T10B10.1</a>    | <a href="#">190134 s at</a> |
| <a href="#">WBGene00000665</a> | <a href="#">col-90</a>  | <a href="#">C29E4.1</a>     | <a href="#">177024 at</a>   |
| <a href="#">WBGene00000697</a> | <a href="#">col-123</a> | <a href="#">W08D2.6</a>     | <a href="#">188339 at</a>   |
| <a href="#">WBGene00000702</a> | <a href="#">col-128</a> | <a href="#">F12F6.9</a>     | <a href="#">188345 s at</a> |
| <a href="#">WBGene00000882</a> | <a href="#">cyn-6</a>   | <a href="#">F42G9.2</a>     | <a href="#">188525 at</a>   |
| <a href="#">WBGene00000902</a> | <a href="#">daf-6</a>   | <a href="#">F31F6.5</a>     | <a href="#">187906 at</a>   |
| <a href="#">WBGene00000905</a> | <a href="#">daf-9</a>   | <a href="#">T13C5.1</a>     | <a href="#">189420 at</a>   |
| <a href="#">WBGene00000928</a> | <a href="#">dao-2</a>   | <a href="#">M03A1.7</a>     | <a href="#">180375 at</a>   |
| <a href="#">WBGene00000979</a> | <a href="#">dhs-16</a>  | <a href="#">C10F3.2</a>     | <a href="#">191950 at</a>   |
| <a href="#">WBGene00000992</a> | <a href="#">dhs-29</a>  | <a href="#">F27D9.6</a>     | <a href="#">179799 s at</a> |
| <a href="#">WBGene00001064</a> | <a href="#">dpy-2</a>   | <a href="#">T14B4.6</a>     | <a href="#">173355 s at</a> |
| <a href="#">WBGene00001065</a> | <a href="#">dpy-3</a>   | <a href="#">EGAP7.1</a>     | <a href="#">189723 s at</a> |
| <a href="#">WBGene00001067</a> | <a href="#">dpy-5</a>   | <a href="#">F27C1.8</a>     | <a href="#">190360 s at</a> |
| <a href="#">WBGene00001069</a> | <a href="#">dpy-7</a>   | <a href="#">F46C8.6</a>     | <a href="#">192146 s at</a> |
| <a href="#">WBGene00001070</a> | <a href="#">dpy-8</a>   | <a href="#">C31H2.2</a>     | <a href="#">190446 s at</a> |
| <a href="#">WBGene00001071</a> | <a href="#">dpy-9</a>   | <a href="#">T21D12.2</a>    | <a href="#">190013 at</a>   |
| <a href="#">WBGene00001072</a> | <a href="#">dpy-10</a>  | <a href="#">T14B4.7</a>     | <a href="#">175025 at</a>   |
| <a href="#">WBGene00001079</a> | <a href="#">dpy-20</a>  | <a href="#">T22B3.1</a>     | <a href="#">191799 at</a>   |
| <a href="#">WBGene00001410</a> | <a href="#">feh-1</a>   | <a href="#">Y54F10AM.2</a>  | <a href="#">174646 at</a>   |
| <a href="#">WBGene00001470</a> | <a href="#">flt-1</a>   | <a href="#">ZK783.4</a>     | <a href="#">174909 at</a>   |
| <a href="#">WBGene00001478</a> | <a href="#">fmo-3</a>   | <a href="#">Y39A1A.19</a>   | <a href="#">194135 at</a>   |
| <a href="#">WBGene00001479</a> | <a href="#">fmo-4</a>   | <a href="#">F53F4.5</a>     | <a href="#">175245 at</a>   |
| <a href="#">WBGene00001570</a> | <a href="#">gei-13</a>  | <a href="#">F58A4.11</a>    | <a href="#">188593 at</a>   |
| <a href="#">WBGene00001633</a> | <a href="#">gly-8</a>   | <a href="#">Y66A7A.6</a>    | <a href="#">190302 at</a>   |
| <a href="#">WBGene00001694</a> | <a href="#">grd-5</a>   | <a href="#">F41E6.2</a>     | <a href="#">180979 at</a>   |
| <a href="#">WBGene00001695</a> | <a href="#">grd-6</a>   | <a href="#">T18H9.1</a>     | <a href="#">188028 at</a>   |
| <a href="#">WBGene00001703</a> | <a href="#">grd-14</a>  | <a href="#">T01B10.2</a>    | <a href="#">185646 at</a>   |
| <a href="#">WBGene00001714</a> | <a href="#">grl-5</a>   | <a href="#">Y47D7A.5</a>    | <a href="#">176327 s at</a> |
| <a href="#">WBGene00001716</a> | <a href="#">grl-7</a>   | <a href="#">T02E9.2</a>     | <a href="#">173004 s at</a> |
| <a href="#">WBGene00001724</a> | <a href="#">grl-15</a>  | <a href="#">Y75B8A.20</a>   | <a href="#">185468 at</a>   |
| <a href="#">WBGene00001730</a> | <a href="#">grl-21</a>  | <a href="#">ZC168.5</a>     | <a href="#">178129 at</a>   |
| <a href="#">WBGene00002039</a> | <a href="#">hum-6</a>   | <a href="#">T10H10.1</a>    | <a href="#">189790 s at</a> |
| <a href="#">WBGene00002087</a> | <a href="#">ins-4</a>   | <a href="#">ZK75.1</a>      | <a href="#">188314 at</a>   |
| <a href="#">WBGene00002088</a> | <a href="#">ins-5</a>   | <a href="#">ZK84.3</a>      | <a href="#">188319 at</a>   |
| <a href="#">WBGene00002393</a> | <a href="#">lpr-1</a>   | <a href="#">Y65B4BR.2</a>   | <a href="#">186995 at</a>   |
| <a href="#">WBGene00003057</a> | <a href="#">lon-3</a>   | <a href="#">ZK836.1</a>     | <a href="#">188368 at</a>   |

|                |                        |                          |                    |
|----------------|------------------------|--------------------------|--------------------|
| WBGene00003523 | <u><i>nas-4</i></u>    | <u><i>C05D11.6</i></u>   | <u>190861 at</u>   |
| WBGene00003553 | <u><i>nas-37</i></u>   | <u><i>C17G1.6</i></u>    | <u>190032 s at</u> |
| WBGene00003681 | <u><i>nhr-91</i></u>   | <u><i>Y15E3A.1</i></u>   | <u>193433 at</u>   |
| WBGene00003769 | <u><i>nlp-31</i></u>   | <u><i>B0213.6</i></u>    | <u>172343 x at</u> |
| WBGene00003968 | <u><i>peb-1</i></u>    | <u><i>T14F9.4</i></u>    | <u>188015 at</u>   |
| WBGene00004017 | <u><i>phg-1</i></u>    | <u><i>F27E5.4</i></u>    | <u>193258 at</u>   |
| WBGene00004091 | <u><i>pps-1</i></u>    | <u><i>T14G10.1</i></u>   | <u>191504 at</u>   |
| WBGene00004099 | <u><i>pqn-5</i></u>    | <u><i>C03A7.4</i></u>    | <u>172360 x at</u> |
| WBGene00004104 | <u><i>pqn-13</i></u>   | <u><i>C14C11.8</i></u>   | <u>185795 at</u>   |
| WBGene00004133 | <u><i>pqn-46</i></u>   | <u><i>F57B9.9</i></u>    | <u>183975 s at</u> |
| WBGene00004174 | <u><i>pqn-95</i></u>   | <u><i>ZK1067.7</i></u>   | <u>174071 at</u>   |
| WBGene00004210 | <u><i>ptc-3</i></u>    | <u><i>Y110A2AL.8</i></u> | <u>187353 s at</u> |
| WBGene00004219 | <u><i>ptr-4</i></u>    | <u><i>C45B2.7</i></u>    | <u>172991 at</u>   |
| WBGene00004224 | <u><i>ptr-10</i></u>   | <u><i>F55F8.1</i></u>    | <u>188170 at</u>   |
| WBGene00004225 | <u><i>ptr-11</i></u>   | <u><i>F56C11.2</i></u>   | <u>171745 x at</u> |
| WBGene00004232 | <u><i>ptr-18</i></u>   | <u><i>Y38F1A.3</i></u>   | <u>188188 s at</u> |
| WBGene00004259 | <u><i>pyr-1</i></u>    | <u><i>D2085.1</i></u>    | <u>173131 at</u>   |
| WBGene00004264 | <u><i>qua-1</i></u>    | <u><i>T05C12.10</i></u>  | <u>190479 s at</u> |
| WBGene00004300 | <u><i>ram-2</i></u>    | <u><i>F38A3.2</i></u>    | <u>188311 s at</u> |
| WBGene00004397 | <u><i>rol-6</i></u>    | <u><i>T01B7.7</i></u>    | <u>192682 at</u>   |
| WBGene00004398 | <u><i>rol-8</i></u>    | <u><i>ZK1290.3</i></u>   | <u>192967 at</u>   |
| WBGene00004978 | <u><i>spq-7</i></u>    | <u><i>Y47G6A.10</i></u>  | <u>188388 at</u>   |
| WBGene00004998 | <u><i>spp-13</i></u>   | <u><i>F08F1.6</i></u>    | <u>181681 at</u>   |
| WBGene00005016 | <u><i>sqt-1</i></u>    | <u><i>B0491.2</i></u>    | <u>192674 s at</u> |
| WBGene00005017 | <u><i>sqt-2</i></u>    | <u><i>C01B12.1</i></u>   | <u>190091 at</u>   |
| WBGene00005018 | <u><i>sqt-3</i></u>    | <u><i>F23H12.4</i></u>   | <u>174910 at</u>   |
| WBGene00006366 | <u><i>sym-1</i></u>    | <u><i>C44H4.3</i></u>    | <u>193344 at</u>   |
| WBGene00006370 | <u><i>sym-5</i></u>    | <u><i>C44H4.2</i></u>    | <u>173271 s at</u> |
| WBGene00006750 | <u><i>unc-10</i></u>   | <u><i>T10A3.1</i></u>    | <u>173800 at</u>   |
| WBGene00006875 | <u><i>vab-9</i></u>    | <u><i>T22C8.8</i></u>    | <u>177583 at</u>   |
| WBGene00006912 | <u><i>vha-3</i></u>    | <u><i>Y38F2AL.4</i></u>  | <u>177110 s at</u> |
| WBGene00006947 | <u><i>wrt-1</i></u>    | <u><i>ZK1290.12</i></u>  | <u>191180 at</u>   |
| WBGene00006948 | <u><i>wrt-2</i></u>    | <u><i>F52E4.6</i></u>    | <u>188061 s at</u> |
| WBGene00006950 | <u><i>wrt-4</i></u>    | <u><i>ZK678.5</i></u>    | <u>190340 s at</u> |
| WBGene00006956 | <u><i>wrt-10</i></u>   | <u><i>ZK1290.8</i></u>   | <u>184676 s at</u> |
| WBGene00007056 | <u><i>tag-198</i></u>  | <u><i>F09G8.2</i></u>    | <u>176158 at</u>   |
| WBGene00007152 | <u><i>clec-225</i></u> | <u><i>B0365.5</i></u>    | <u>189983 at</u>   |
| WBGene00007174 | <u><i>B0395.2</i></u>  | <u><i>B0395.2</i></u>    | <u>190760 at</u>   |
| WBGene00007214 | <u><i>C01A2.2</i></u>  | <u><i>C01A2.2</i></u>    | <u>177410 at</u>   |
| WBGene00007252 | <u><i>C01H6.2</i></u>  | <u><i>C01H6.2</i></u>    | <u>190335 s at</u> |
| WBGene00007264 | <u><i>C02F4.4</i></u>  | <u><i>C02F4.4</i></u>    | <u>177870 at</u>   |
| WBGene00007344 | <u><i>C05E7.2</i></u>  | <u><i>C05E7.2</i></u>    | <u>177489 at</u>   |
| WBGene00007479 | <u><i>C09F9.2</i></u>  | <u><i>C09F9.2</i></u>    | <u>177549 s at</u> |
| WBGene00007552 | <u><i>C13C12.2</i></u> | <u><i>C13C12.2</i></u>   | <u>180960 at</u>   |
| WBGene00007560 | <u><i>C14A4.9</i></u>  | <u><i>C14A4.9</i></u>    | <u>178508 at</u>   |
| WBGene00007938 | <u><i>C34F6.1</i></u>  | <u><i>C34F6.1</i></u>    | <u>193974 s at</u> |
| WBGene00007994 | <u><i>C37E2.2</i></u>  | <u><i>C37E2.2</i></u>    | <u>193164 at</u>   |
| WBGene00007999 | <u><i>tag-297</i></u>  | <u><i>C38C6.6</i></u>    | <u>179686 at</u>   |
| WBGene00008292 | <u><i>C54C8.4</i></u>  | <u><i>C54C8.4</i></u>    | <u>189874 at</u>   |
| WBGene00008486 | <u><i>ugt-44</i></u>   | <u><i>F01D4.2</i></u>    | <u>191445 at</u>   |
| WBGene00008492 | <u><i>F01D5.1</i></u>  | <u><i>F01D5.1</i></u>    | <u>178017 s at</u> |
| WBGene00008496 | <u><i>F01D5.6</i></u>  | <u><i>F01D5.6</i></u>    | <u>178244 at</u>   |

|                |                  |                  |                    |
|----------------|------------------|------------------|--------------------|
| WBGene00008511 | <u>F01G10.9</u>  | <u>F01G10.9</u>  | <u>174273 at</u>   |
| WBGene00008549 | <u>din-1</u>     | <u>F07A11.6</u>  | <u>193843 s at</u> |
| WBGene00008605 | <u>mlt-9</u>     | <u>F09B12.1</u>  | <u>184828 s at</u> |
| WBGene00008743 | <u>F13D12.9</u>  | <u>F13D12.9</u>  | <u>180072 s at</u> |
| WBGene00008851 | <u>F15B9.8</u>   | <u>F15B9.8</u>   | <u>191688 at</u>   |
| WBGene00008865 | <u>F15G9.1</u>   | <u>F15G9.1</u>   | <u>171746 x at</u> |
| WBGene00008963 | <u>F19H8.2</u>   | <u>F19H8.2</u>   | <u>178930 at</u>   |
| WBGene00008967 | <u>F20B10.3</u>  | <u>F20B10.3</u>  | <u>183717 at</u>   |
| WBGene00008987 | <u>F20G2.3</u>   | <u>F20G2.3</u>   | <u>179155 s at</u> |
| WBGene00009094 | <u>F23H12.5</u>  | <u>F23H12.5</u>  | <u>191805 s at</u> |
| WBGene00009108 | <u>F25D1.3</u>   | <u>F25D1.3</u>   | <u>178006 at</u>   |
| WBGene00009331 | <u>F32D8.7</u>   | <u>F32D8.7</u>   | <u>193677 at</u>   |
| WBGene00009423 | <u>F35E8.10</u>  | <u>F35E8.10</u>  | <u>183700 s at</u> |
| WBGene00009573 | <u>F40E10.5</u>  | <u>F40E10.5</u>  | <u>181113 at</u>   |
| WBGene00009678 | <u>F44D12.1</u>  | <u>F44D12.1</u>  | <u>191627 at</u>   |
| WBGene00009717 | <u>dep-1</u>     | <u>F44G4.8</u>   | <u>191570 s at</u> |
| WBGene00009791 | <u>F46F3.3</u>   | <u>F46F3.3</u>   | <u>178165 at</u>   |
| WBGene00009799 | <u>lqc-47</u>    | <u>F47A4.1</u>   | <u>190673 s at</u> |
| WBGene00009816 | <u>F47B10.5</u>  | <u>F47B10.5</u>  | <u>180523 at</u>   |
| WBGene00009888 | <u>F49E2.5</u>   | <u>F49E2.5</u>   | <u>180098 s at</u> |
| WBGene00009889 | <u>F49E11.2</u>  | <u>F49E11.2</u>  | <u>192248 at</u>   |
| WBGene00009926 | <u>noah-2</u>    | <u>F52B11.3</u>  | <u>181136 s at</u> |
| WBGene00009983 | <u>F53F1.5</u>   | <u>F53F1.5</u>   | <u>172799 x at</u> |
| WBGene00010078 | <u>acl-10</u>    | <u>F55A11.5</u>  | <u>193442 at</u>   |
| WBGene00010267 | <u>lips-9</u>    | <u>F58G1.5</u>   | <u>178343 s at</u> |
| WBGene00010285 | <u>F58H1.2</u>   | <u>F58H1.2</u>   | <u>179510 at</u>   |
| WBGene00010291 | <u>F58H10.1</u>  | <u>F58H10.1</u>  | <u>181912 at</u>   |
| WBGene00010321 | <u>F59B10.5</u>  | <u>F59B10.5</u>  | <u>187247 at</u>   |
| WBGene00010418 | <u>H27A22.1</u>  | <u>H27A22.1</u>  | <u>189612 at</u>   |
| WBGene00010573 | <u>K04H4.2</u>   | <u>K04H4.2</u>   | <u>190901 s at</u> |
| WBGene00010621 | <u>K07A12.2</u>  | <u>K07A12.2</u>  | <u>194069 s at</u> |
| WBGene00010673 | <u>K08E7.5</u>   | <u>K08E7.5</u>   | <u>174508 s at</u> |
| WBGene00010714 | <u>K09B11.10</u> | <u>K09B11.10</u> | <u>184682 s at</u> |
| WBGene00010835 | <u>M03B6.3</u>   | <u>M03B6.3</u>   | <u>179034 s at</u> |
| WBGene00011107 | <u>R07E3.6</u>   | <u>R07E3.6</u>   | <u>178194 at</u>   |
| WBGene00011112 | <u>R07E5.4</u>   | <u>R07E5.4</u>   | <u>188853 at</u>   |
| WBGene00011235 | <u>R11A5.7</u>   | <u>R11A5.7</u>   | <u>172989 s at</u> |
| WBGene00011313 | <u>T01B7.8</u>   | <u>T01B7.8</u>   | <u>177804 at</u>   |
| WBGene00011487 | <u>T05E12.6</u>  | <u>T05E12.6</u>  | <u>184116 s at</u> |
| WBGene00011548 | <u>T06G6.6</u>   | <u>T06G6.6</u>   | <u>177505 at</u>   |
| WBGene00011590 | <u>bus-19</u>    | <u>T07F10.4</u>  | <u>192607 at</u>   |
| WBGene00011796 | <u>T16G1.2</u>   | <u>T16G1.2</u>   | <u>178131 at</u>   |
| WBGene00011831 | <u>T19B10.2</u>  | <u>T19B10.2</u>  | <u>181714 at</u>   |
| WBGene00011869 | <u>dod-6</u>     | <u>T20G5.7</u>   | <u>172218 x at</u> |
| WBGene00011870 | <u>T20G5.8</u>   | <u>T20G5.8</u>   | <u>172248 x at</u> |
| WBGene00012032 | <u>T26C5.2</u>   | <u>T26C5.2</u>   | <u>177643 at</u>   |
| WBGene00012186 | <u>mlt-11</u>    | <u>W01F3.3</u>   | <u>194086 at</u>   |
| WBGene00012239 | <u>W04A8.4</u>   | <u>W04A8.4</u>   | <u>178654 s at</u> |
| WBGene00012255 | <u>W04G3.1</u>   | <u>W04G3.1</u>   | <u>177724 at</u>   |
| WBGene00012256 | <u>W04G3.2</u>   | <u>W04G3.2</u>   | <u>173579 s at</u> |
| WBGene00012257 | <u>lpr-4</u>     | <u>W04G3.3</u>   | <u>177916 at</u>   |
| WBGene00012261 | <u>lpr-3</u>     | <u>W04G3.8</u>   | <u>177650 at</u>   |

|                |                        |                   |                    |
|----------------|------------------------|-------------------|--------------------|
| WBGene00012348 | <u><i>pptr-1</i></u>   | <u>W08G11.4</u>   | <u>191709 at</u>   |
| WBGene00012383 | <u><i>ttr-17</i></u>   | <u>Y5F2A.2</u>    | <u>190906 at</u>   |
| WBGene00012403 | <u><i>srz-45</i></u>   | <u>Y6G8.1</u>     | <u>177363 at</u>   |
| WBGene00012429 | <u>Y11D7A.5</u>        | <u>Y11D7A.5</u>   | <u>183724 at</u>   |
| WBGene00012433 | <u>Y11D7A.9</u>        | <u>Y11D7A.9</u>   | <u>182561 at</u>   |
| WBGene00012540 | <u>Y37A1B.7</u>        | <u>Y37A1B.7</u>   | <u>182386 s at</u> |
| WBGene00012545 | <u>Y37D8A.3</u>        | <u>Y37D8A.3</u>   | <u>182387 at</u>   |
| WBGene00012628 | <u>Y38H6C.16</u>       | <u>Y38H6C.16</u>  | <u>186502 at</u>   |
| WBGene00012635 | <u>Y38H8A.1</u>        | <u>Y38H8A.1</u>   | <u>180611 at</u>   |
| WBGene00012796 | <u>Y43F4A.1</u>        | <u>Y43F4A.1</u>   | <u>192483 at</u>   |
| WBGene00012942 | <u>Y47D3B.6</u>        | <u>Y47D3B.6</u>   | <u>182743 at</u>   |
| WBGene00013079 | <u><i>ttr-26</i></u>   | <u>Y51A2D.11</u>  | <u>191333 at</u>   |
| WBGene00013225 | <u>Y56A3A.2</u>        | <u>Y56A3A.2</u>   | <u>183427 s at</u> |
| WBGene00013681 | <u>Y105E8A.24</u>      | <u>Y105E8A.24</u> | <u>173361 s at</u> |
| WBGene00013693 | <u>Y105E8B.9</u>       | <u>Y105E8B.9</u>  | <u>176434 s at</u> |
| WBGene00014182 | <u>ZK1025.2</u>        | <u>ZK1025.2</u>   | <u>184102 s at</u> |
| WBGene00014183 | <u>ZK1025.3</u>        | <u>ZK1025.3</u>   | <u>182104 at</u>   |
| WBGene00014184 | <u>ZK1025.4</u>        | <u>ZK1025.4</u>   | <u>172191 x at</u> |
| WBGene00015019 | <u>B0205.4</u>         | <u>B0205.4</u>    | <u>181640 at</u>   |
| WBGene00015142 | <u>B0310.6</u>         | <u>B0310.6</u>    | <u>187570 at</u>   |
| WBGene00015300 | <u>C01F1.5</u>         | <u>C01F1.5</u>    | <u>184053 at</u>   |
| WBGene00015339 | <u>C02E7.6</u>         | <u>C02E7.6</u>    | <u>171796 x at</u> |
| WBGene00015510 | <u>C06A6.5</u>         | <u>C06A6.5</u>    | <u>183138 at</u>   |
| WBGene00015545 | <u>C06G1.1</u>         | <u>C06G1.1</u>    | <u>183120 at</u>   |
| WBGene00015553 | <u><i>trxr-1</i></u>   | <u>C06G3.7</u>    | <u>193643 s at</u> |
| WBGene00015646 | <u><i>mlt-10</i></u>   | <u>C09E8.3</u>    | <u>171945 x at</u> |
| WBGene00015769 | <u>C14C11.7</u>        | <u>C14C11.7</u>   | <u>186432 at</u>   |
| WBGene00015781 | <u>C14F11.6</u>        | <u>C14F11.6</u>   | <u>193712 s at</u> |
| WBGene00015795 | <u>C15F1.2</u>         | <u>C15F1.2</u>    | <u>181480 at</u>   |
| WBGene00015841 | <u>C16C8.2</u>         | <u>C16C8.2</u>    | <u>190213 s at</u> |
| WBGene00016018 | <u>C23H3.2</u>         | <u>C23H3.2</u>    | <u>182261 at</u>   |
| WBGene00016022 | <u>C23H3.9</u>         | <u>C23H3.9</u>    | <u>182086 s at</u> |
| WBGene00016029 | <u>C24A1.2</u>         | <u>C24A1.2</u>    | <u>174326 s at</u> |
| WBGene00016046 | <u>C24B5.4</u>         | <u>C24B5.4</u>    | <u>182933 at</u>   |
| WBGene00016133 | <u>C26B9.3</u>         | <u>C26B9.3</u>    | <u>180439 at</u>   |
| WBGene00016138 | <u><i>flh-2</i></u>    | <u>C26E6.2</u>    | <u>181406 at</u>   |
| WBGene00016329 | <u><i>osr-1</i></u>    | <u>C32E12.3</u>   | <u>191522 s at</u> |
| WBGene00016422 | <u><i>noah-1</i></u>   | <u>C34G6.6</u>    | <u>183775 at</u>   |
| WBGene00016429 | <u>C35A11.2</u>        | <u>C35A11.2</u>   | <u>184813 at</u>   |
| WBGene00016596 | <u>C42D4.3</u>         | <u>C42D4.3</u>    | <u>180540 at</u>   |
| WBGene00016996 | <u>D1005.2</u>         | <u>D1005.2</u>    | <u>182178 at</u>   |
| WBGene00017201 | <u><i>grsp-4</i></u>   | <u>F07C4.7</u>    | <u>180474 at</u>   |
| WBGene00017212 | <u>F07E5.7</u>         | <u>F07E5.7</u>    | <u>180026 at</u>   |
| WBGene00017307 | <u>F09F9.2</u>         | <u>F09F9.2</u>    | <u>183159 at</u>   |
| WBGene00017340 | <u>F10D7.3</u>         | <u>F10D7.3</u>    | <u>189407 at</u>   |
| WBGene00017420 | <u>F13B9.2</u>         | <u>F13B9.2</u>    | <u>182515 at</u>   |
| WBGene00017483 | <u><i>lqc-22</i></u>   | <u>F15E6.2</u>    | <u>181326 at</u>   |
| WBGene00017535 | <u>F17A9.3</u>         | <u>F17A9.3</u>    | <u>191134 at</u>   |
| WBGene00017560 | <u>F18C5.5</u>         | <u>F18C5.5</u>    | <u>180882 s at</u> |
| WBGene00017716 | <u>F22F4.1</u>         | <u>F22F4.1</u>    | <u>182812 at</u>   |
| WBGene00017937 | <u>F30H5.3</u>         | <u>F30H5.3</u>    | <u>191217 s at</u> |
| WBGene00017991 | <u><i>clec-180</i></u> | <u>F32E10.3</u>   | <u>192712 at</u>   |

|                |                  |                  |                    |
|----------------|------------------|------------------|--------------------|
| WBGene00017998 | <u>F33D4.6</u>   | <u>F33D4.6</u>   | <u>185424 s at</u> |
| WBGene00018162 | <u>nspb-3</u>    | <u>F38A5.5</u>   | <u>172417 x at</u> |
| WBGene00018167 | <u>nspb-4</u>    | <u>F38A5.10</u>  | <u>185454 s at</u> |
| WBGene00018297 | <u>F41F3.3</u>   | <u>F41F3.3</u>   | <u>172741 x at</u> |
| WBGene00018418 | <u>F44E2.4</u>   | <u>F44E2.4</u>   | <u>175015 at</u>   |
| WBGene00018510 | <u>F46F11.7</u>  | <u>F46F11.7</u>  | <u>184462 at</u>   |
| WBGene00018514 | <u>F46G11.1</u>  | <u>F46G11.1</u>  | <u>184787 at</u>   |
| WBGene00018515 | <u>F46G11.2</u>  | <u>F46G11.2</u>  | <u>184787 at</u>   |
| WBGene00018616 | <u>F48G7.5</u>   | <u>F48G7.5</u>   | <u>183665 s at</u> |
| WBGene00018694 | <u>F52E1.5</u>   | <u>F52E1.5</u>   | <u>180948 at</u>   |
| WBGene00018706 | <u>F52F10.2</u>  | <u>F52F10.2</u>  | <u>175060 at</u>   |
| WBGene00018737 | <u>F53B1.4</u>   | <u>F53B1.4</u>   | <u>193327 at</u>   |
| WBGene00018738 | <u>F53B1.6</u>   | <u>F53B1.6</u>   | <u>180743 at</u>   |
| WBGene00018928 | <u>F56B3.2</u>   | <u>F56B3.2</u>   | <u>187757 s at</u> |
| WBGene00018965 | <u>F56D2.3</u>   | <u>F56D2.3</u>   | <u>182923 at</u>   |
| WBGene00019021 | <u>F57H12.6</u>  | <u>F57H12.6</u>  | <u>186012 s at</u> |
| WBGene00019148 | <u>H03E18.1</u>  | <u>H03E18.1</u>  | <u>174628 s at</u> |
| WBGene00019154 | <u>glf-1</u>     | <u>H04M03.4</u>  | <u>186362 s at</u> |
| WBGene00019198 | <u>H14E04.1</u>  | <u>H14E04.1</u>  | <u>186267 at</u>   |
| WBGene00019212 | <u>H19M22.3</u>  | <u>H19M22.3</u>  | <u>188528 at</u>   |
| WBGene00019236 | <u>H23N18.5</u>  | <u>H23N18.5</u>  | <u>185593 at</u>   |
| WBGene00019268 | <u>H41C03.1</u>  | <u>H41C03.1</u>  | <u>185591 at</u>   |
| WBGene00019272 | <u>H42K12.3</u>  | <u>H42K12.3</u>  | <u>173124 s at</u> |
| WBGene00019285 | <u>cbn-1</u>     | <u>K01A2.11</u>  | <u>187124 s at</u> |
| WBGene00019318 | <u>K02E10.4</u>  | <u>K02E10.4</u>  | <u>185492 at</u>   |
| WBGene00019346 | <u>K02G10.5</u>  | <u>K02G10.5</u>  | <u>192258 s at</u> |
| WBGene00019520 | <u>K08B12.1</u>  | <u>K08B12.1</u>  | <u>185835 at</u>   |
| WBGene00019604 | <u>K09H11.7</u>  | <u>K09H11.7</u>  | <u>190688 s at</u> |
| WBGene00019660 | <u>K11H12.4</u>  | <u>K11H12.4</u>  | <u>184313 s at</u> |
| WBGene00019759 | <u>M03F4.6</u>   | <u>M03F4.6</u>   | <u>174254 at</u>   |
| WBGene00019772 | <u>M04G7.1</u>   | <u>M04G7.1</u>   | <u>180311 at</u>   |
| WBGene00019839 | <u>R02F11.1</u>  | <u>R02F11.1</u>  | <u>185334 s at</u> |
| WBGene00019942 | <u>R07G3.6</u>   | <u>R07G3.6</u>   | <u>187228 at</u>   |
| WBGene00020083 | <u>R57.2</u>     | <u>R57.2</u>     | <u>177325 at</u>   |
| WBGene00020200 | <u>T04A6.1</u>   | <u>T04A6.1</u>   | <u>182798 at</u>   |
| WBGene00020237 | <u>phat-4</u>    | <u>T05B4.3</u>   | <u>182573 at</u>   |
| WBGene00020250 | <u>T05C1.3</u>   | <u>T05C1.3</u>   | <u>181888 at</u>   |
| WBGene00020426 | <u>T10H10.2</u>  | <u>T10H10.2</u>  | <u>186136 at</u>   |
| WBGene00020501 | <u>T14B4.5</u>   | <u>T14B4.5</u>   | <u>183942 s at</u> |
| WBGene00020554 | <u>T19A5.3</u>   | <u>T19A5.3</u>   | <u>183911 at</u>   |
| WBGene00020626 | <u>T20F5.4</u>   | <u>T20F5.4</u>   | <u>173494 s at</u> |
| WBGene00020704 | <u>T22F7.5</u>   | <u>T22F7.5</u>   | <u>182080 at</u>   |
| WBGene00020734 | <u>tag-249</u>   | <u>T23F2.1</u>   | <u>190020 at</u>   |
| WBGene00020806 | <u>T25F10.3</u>  | <u>T25F10.3</u>  | <u>186385 at</u>   |
| WBGene00020846 | <u>T27A10.6</u>  | <u>T27A10.6</u>  | <u>174781 at</u>   |
| WBGene00020911 | <u>cpt-6</u>     | <u>W01A11.5</u>  | <u>192205 s at</u> |
| WBGene00021084 | <u>W08E12.3</u>  | <u>W08E12.3</u>  | <u>172503 x at</u> |
| WBGene00021085 | <u>W08E12.4</u>  | <u>W08E12.4</u>  | <u>172545 x at</u> |
| WBGene00021095 | <u>mlt-8</u>     | <u>W08F4.6</u>   | <u>182327 at</u>   |
| WBGene00021407 | <u>Y38C1AB.5</u> | <u>Y38C1AB.5</u> | <u>186604 s at</u> |
| WBGene00021625 | <u>Y47D7A.13</u> | <u>Y47D7A.13</u> | <u>175393 at</u>   |
| WBGene00021709 | <u>uqt-29</u>    | <u>Y49C4A.8</u>  | <u>176819 s at</u> |

|                       |                   |                   |                    |
|-----------------------|-------------------|-------------------|--------------------|
| <u>WBGene00021850</u> | <u>Y54F10AM.6</u> | <u>Y54F10AM.6</u> | <u>176474 at</u>   |
| <u>WBGene00021936</u> | <u>Y55F3BL.2</u>  | <u>Y55F3BL.2</u>  | <u>186650 at</u>   |
| <u>WBGene00021963</u> | <u>Y57E12B.3</u>  | <u>Y57E12B.3</u>  | <u>176402 at</u>   |
| <u>WBGene00022024</u> | <u>Y64H9A.2</u>   | <u>Y64H9A.2</u>   | <u>175115 at</u>   |
| <u>WBGene00022103</u> | <u>cdh-12</u>     | <u>Y71D11A.1</u>  | <u>176188 at</u>   |
| <u>WBGene00022283</u> | <u>lqc-27</u>     | <u>Y74E4A.1</u>   | <u>184629 at</u>   |
| <u>WBGene00022287</u> | <u>Y75B7AR.1</u>  | <u>Y75B7AR.1</u>  | <u>175576 s at</u> |
| <u>WBGene00022415</u> | <u>Y102A11A.5</u> | <u>Y102A11A.5</u> | <u>176459 at</u>   |
| <u>WBGene00022591</u> | <u>ZC328.1</u>    | <u>ZC328.1</u>    | <u>180055 at</u>   |
| <u>WBGene00022611</u> | <u>ZC449.1</u>    | <u>ZC449.1</u>    | <u>183222 at</u>   |
| <u>WBGene00022816</u> | <u>fbn-1</u>      | <u>ZK783.1</u>    | <u>181745 at</u>   |
| <u>WBGene00077490</u> | <u>M03A1.8</u>    | <u>M03A1.8</u>    | <u>180375 at</u>   |



**Supplementary Table S3. Gene ontology analysis of genes identified as decreased in *nhr-23* RNAi microarray experiment**

| Annotation Cluster 1 |                                                                                 | Enrichment Score: 12.429857987753422 |          |          |            |          |           |                 |
|----------------------|---------------------------------------------------------------------------------|--------------------------------------|----------|----------|------------|----------|-----------|-----------------|
| Category             | Term                                                                            | Count                                | %        | PValue   | List Total | Pop Hits | Pop Total | Fold Enrichment |
| GOTERM_BP_FAT        | GO:0018988~molting cycle, protein-based cuticle                                 | 25                                   | 9.433962 | 3.61E-13 | 123        | 248      | 7838      | 6.423748        |
| GOTERM_BP_FAT        | GO:0018996~molting cycle, collagen and cuticulin-based cuticle                  | 25                                   | 9.433962 | 3.61E-13 | 123        | 248      | 7838      | 6.423748        |
| GOTERM_BP_FAT        | GO:0042303~molting cycle                                                        | 25                                   | 9.433962 | 3.94E-13 | 123        | 249      | 7838      | 6.39795         |
| Annotation Cluster 2 |                                                                                 | Enrichment Score: 6.379064358969817  |          |          |            |          |           |                 |
| Category             | Term                                                                            | Count                                | %        | PValue   | List Total | Pop Hits | Pop Total | Fold Enrichment |
| SP_PIR_KEYWORDS      | cuticle                                                                         | 12                                   | 4.528302 | 5.96E-13 | 263        | 35       | 19674     | 25.6478         |
| GOTERM_MF_FAT        | GO:0042302~structural constituent of cuticle                                    | 19                                   | 7.169811 | 2.33E-11 | 107        | 155      | 6686      | 7.659572        |
| UP_SEQ_FEATURE       | region of interest:Triple-helical region IPR008160:Collagen triple helix repeat | 10                                   | 3.773585 | 7.79E-11 | 41         | 33       | 3249      | 24.0133         |
| INTERPRO             | IPR002486:Nematode cuticle collagen, N-terminal                                 | 18                                   | 6.792453 | 5.40E-10 | 189        | 182      | 13633     | 7.133961        |
| INTERPRO             | disulfide bond                                                                  | 16                                   | 6.037736 | 1.71E-09 | 189        | 147      | 13633     | 7.851132        |
| SP_PIR_KEYWORDS      | collagen                                                                        | 16                                   | 6.037736 | 1.21E-06 | 263        | 247      | 19674     | 4.845738        |
| SP_PIR_KEYWORDS      | collagen                                                                        | 10                                   | 3.773585 | 5.91E-06 | 263        | 97       | 19674     | 7.711967        |
| GOTERM_BP_FAT        | GO:0010171~body morphogenesis                                                   | 25                                   | 9.433962 | 8.17E-06 | 123        | 582      | 7838      | 2.737267        |
| PIR_SUPERFAMILY      | PIRSF038285:cuticle collagen                                                    | 8                                    | 3.018868 | 1.56E-05 | 53         | 73       | 4541      | 9.389506        |
| GOTERM_MF_FAT        | GO:0005198~structural molecule activity                                         | 21                                   | 7.924528 | 3.62E-05 | 107        | 468      | 6686      | 2.803858        |
| GOTERM_BP_FAT        | GO:0040002~collagen and cuticulin-based cuticle development                     | 9                                    | 3.396226 | 6.74E-05 | 123        | 89       | 7838      | 6.443957        |
| GOTERM_BP_FAT        | GO:0007592~protein-based cuticle development                                    | 9                                    | 3.396226 | 7.91E-05 | 123        | 91       | 7838      | 6.302332        |
| GOTERM_BP_FAT        | GO:0042335~cuticle development                                                  | 9                                    | 3.396226 | 7.91E-05 | 123        | 91       | 7838      | 6.302332        |
| UP_SEQ_FEATURE       | mutagenesis site                                                                | 4                                    | 1.509434 | 0.356032 | 41         | 172      | 3249      | 1.842881        |

|                      |                                                                    |                                     |          |          |            |          |           |                 |
|----------------------|--------------------------------------------------------------------|-------------------------------------|----------|----------|------------|----------|-----------|-----------------|
| Annotation Cluster 3 |                                                                    | Enrichment Score: 5.68209004630328  |          |          |            |          |           |                 |
| Category             | Term                                                               | Count                               | %        | PValue   | List Total | Pop Hits | Pop Total | Fold Enrichment |
| SMART                | SM00289:WR1                                                        | 9                                   | 3.396226 | 1.71E-07 | 72         | 50       | 5537      | 13.8425         |
| INTERPRO             | IPR006150:Cysteine-rich repeat                                     | 9                                   | 3.396226 | 3.69E-07 | 189        | 50       | 13633     | 12.98381        |
| INTERPRO             | IPR006149:Nematode-specific EB region                              | 5                                   | 1.886792 | 1.43E-04 | 189        | 20       | 13633     | 18.03307        |
| Annotation Cluster 4 |                                                                    | Enrichment Score: 5.296091128500724 |          |          |            |          |           |                 |
| Category             | Term                                                               | Count                               | %        | PValue   | List Total | Pop Hits | Pop Total | Fold Enrichment |
| UP_SEQ_FEATURE       | signal peptide                                                     | 21                                  | 7.924528 | 1.39E-08 | 41         | 422      | 3249      | 3.943417        |
| SP_PIR_KEYWORDS      | signal                                                             | 21                                  | 7.924528 | 1.14E-06 | 263        | 424      | 19674     | 3.705018        |
| GOTERM_CC_FAT        | GO:0005576~extracellular region                                    | 16                                  | 6.037736 | 2.11E-05 | 110        | 311      | 7912      | 3.700438        |
| SP_PIR_KEYWORDS      | Secreted                                                           | 9                                   | 3.396226 | 0.001967 | 263        | 169      | 19674     | 3.983756        |
| Annotation Cluster 5 |                                                                    | Enrichment Score: 5.050007776454602 |          |          |            |          |           |                 |
| Category             | Term                                                               | Count                               | %        | PValue   | List Total | Pop Hits | Pop Total | Fold Enrichment |
| SMART                | SM00473:PAN_AP                                                     | 6                                   | 2.264151 | 6.68E-06 | 72         | 22       | 5537      | 20.97348        |
| INTERPRO             | IPR003014:PAN-1 domain                                             | 6                                   | 2.264151 | 1.03E-05 | 189        | 22       | 13633     | 19.67244        |
| INTERPRO             | IPR003609:Apple-like                                               | 6                                   | 2.264151 | 1.03E-05 | 189        | 22       | 13633     | 19.67244        |
| Annotation Cluster 6 |                                                                    | Enrichment Score: 4.501631713985456 |          |          |            |          |           |                 |
| Category             | Term                                                               | Count                               | %        | PValue   | List Total | Pop Hits | Pop Total | Fold Enrichment |
| GOTERM_BP_FAT        | GO:0040014~regulation of multicellular organism growth             | 22                                  | 8.301887 | 1.37E-06 | 123        | 415      | 7838      | 3.378117        |
| GOTERM_BP_FAT        | GO:0040018~positive regulation of multicellular organism growth    | 16                                  | 6.037736 | 1.32E-04 | 123        | 322      | 7838      | 3.166389        |
| GOTERM_BP_FAT        | GO:0051240~positive regulation of multicellular organismal process | 16                                  | 6.037736 | 1.73E-04 | 123        | 330      | 7838      | 3.089628        |
| Annotation Cluster 7 |                                                                    | Enrichment Score: 4.181221145910459 |          |          |            |          |           |                 |
| Category             | Term                                                               | Count                               | %        | PValue   | List Total | Pop Hits | Pop Total | Fold Enrichment |

|                      |                                                        |                                      |          |          |            |          |           |                 |
|----------------------|--------------------------------------------------------|--------------------------------------|----------|----------|------------|----------|-----------|-----------------|
| INTERPRO             | IPR003392:Patched                                      | 6                                    | 2.264151 | 4.29E-05 | 189        | 29       | 13633     | 14.92392        |
| INTERPRO             | IPR000731:Sterol-sensing 5TM box                       | 6                                    | 2.264151 | 7.04E-05 | 189        | 32       | 13633     | 13.5248         |
| GOTERM_MF_FAT        | GO:0008158~hedgehog receptor activity                  | 6                                    | 2.264151 | 9.47E-05 | 107        | 30       | 6686      | 12.4972         |
| Annotation Cluster 8 |                                                        | Enrichment Score: 2.1099516696643033 |          |          |            |          |           |                 |
| Category             | Term                                                   | Count                                | %        | PValue   | List Total | Pop Hits | Pop Total | Fold Enrichment |
| PIR_SUPERFAMILY      | PIRSF009400:Peptidase_C46                              | 3                                    | 1.132075 | 0.001874 | 53         | 6        | 4541      | 42.83962        |
|                      | IPR001657:Peptidase C46, hedgehog protein              | 3                                    | 1.132075 | 0.002736 | 189        | 6        | 13633     | 36.06614        |
| INTERPRO             | IPR006141:Intein splicing site                         | 3                                    | 1.132075 | 0.006389 | 189        | 9        | 13633     | 24.04409        |
| SMART                | SM00306:HintN                                          | 3                                    | 1.132075 | 0.006826 | 72         | 10       | 5537      | 23.07083        |
| SMART                | SM00305:HintC                                          | 3                                    | 1.132075 | 0.006826 | 72         | 10       | 5537      | 23.07083        |
| INTERPRO             | IPR003587:Hedgehog/intein hint, N-terminal             | 3                                    | 1.132075 | 0.007915 | 189        | 10       | 13633     | 21.63968        |
| INTERPRO             | IPR003586:Hedgehog/intein hint domain, C-terminal      | 3                                    | 1.132075 | 0.007915 | 189        | 10       | 13633     | 21.63968        |
| INTERPRO             | IPR001767:Peptidase C46, hedgehog protein, hint region | 3                                    | 1.132075 | 0.007915 | 189        | 10       | 13633     | 21.63968        |
| GOTERM_BP_FAT        | GO:0030908~protein splicing                            | 3                                    | 1.132075 | 0.008054 | 123        | 9        | 7838      | 21.24119        |
| GOTERM_BP_FAT        | GO:0016539~intein-mediated protein splicing            | 3                                    | 1.132075 | 0.008054 | 123        | 9        | 7838      | 21.24119        |
| GOTERM_BP_FAT        | GO:0016485~protein processing                          | 3                                    | 1.132075 | 0.031248 | 123        | 18       | 7838      | 10.6206         |
| GOTERM_BP_FAT        | GO:0051604~protein maturation                          | 3                                    | 1.132075 | 0.031248 | 123        | 18       | 7838      | 10.6206         |
| Annotation Cluster 9 |                                                        | Enrichment Score: 2.046226678500976  |          |          |            |          |           |                 |
| Category             | Term                                                   | Count                                | %        | PValue   | List Total | Pop Hits | Pop Total | Fold Enrichment |
| GOTERM_BP_FAT        | GO:0009791~post-embryonic development                  | 43                                   | 16.22642 | 0.001952 | 123        | 1779     | 7838      | 1.540255        |
| GOTERM_BP_FAT        | GO:0045927~positive regulation of growth               | 45                                   | 16.98113 | 0.002244 | 123        | 1904     | 7838      | 1.506072        |
| GOTERM_BP_FAT        | GO:0002119~nematode larval development                 | 41                                   | 15.4717  | 0.005348 | 123        | 1760     | 7838      | 1.48447         |
| GOTERM_BP_FAT        | GO:0002164~larval development                          | 41                                   | 15.4717  | 0.005403 | 123        | 1761     | 7838      | 1.483627        |
| GOTERM_BP_FAT        | GO:0040007~growth                                      | 23                                   | 8.679245 | 0.464116 | 123        | 1364     | 7838      | 1.074518        |

| Annotation Cluster 10 |                                                              | Enrichment Score: 2.0405798385132465 |          |          |            |          |           |                 |
|-----------------------|--------------------------------------------------------------|--------------------------------------|----------|----------|------------|----------|-----------|-----------------|
| Category              | Term                                                         | Count                                | %        | PValue   | List Total | Pop Hits | Pop Total | Fold Enrichment |
| GOTERM_BP_FAT         | GO:0040008~regulation of growth<br>GO:0009791~post-embryonic | 49                                   | 18.49057 | 3.33E-04 | 123        | 1967     | 7838      | 1.58742         |
| GOTERM_BP_FAT         | GO:0045927~positive regulation of<br>development             | 43                                   | 16.22642 | 0.001952 | 123        | 1779     | 7838      | 1.540255        |
| GOTERM_BP_FAT         | GO:0040010~positive regulation of<br>growth                  | 45                                   | 16.98113 | 0.002244 | 123        | 1904     | 7838      | 1.506072        |
| GOTERM_BP_FAT         | GO:0040009~regulation of growth<br>rate                      | 32                                   | 12.07547 | 0.206675 | 123        | 1723     | 7838      | 1.183491        |
| GOTERM_BP_FAT         | GO:0040009~regulation of growth<br>rate                      | 32                                   | 12.07547 | 0.207674 | 123        | 1724     | 7838      | 1.182804        |
